# Supplementary material for: $L_p$ Loss Functions in Invariance Alignment and Haberman Linking
Source: Preprints.org preprint supplement (doi:10.20944/preprints202006.0034.v1), 2020-06-04
Supplement: Supplementary file 1 [file supplementary]

*Supplement*  
 $L_p$  Loss Functions in Invariance Alignment and  
Haberman Linking

**Table of Contents**

|                                              |    |
|----------------------------------------------|----|
| Supplement A: Additional Results for Study 1 | 2  |
| Supplement B: Additional Results for Study 2 | 17 |

Enclosed in this document are the supplemental materials for our article entitled " $L_p$  Loss Functions in Invariance Alignment and Haberman Linking".

Supplement A contains additional tables to the results of Study 1 reported in the article. Supplement B contains additional tables to the results of Study 2 reported in the article.

## Supplement A: Additional Results for Study 1

The following pages contain additional results for Simulation Study 1. Tables A1 to A4 show the average absolute bias of group means as a function of the number of groups ( $G = 3$  or  $G = 6$ ) and in the case of no DIF and for DIF. Tables A5 and A6 show the average RMSE of group means for  $G = 3$  groups and in the case of no DIF and for DIF. Tables A7 to A10 show the average absolute bias of group standard deviations as a function of the number of groups ( $G = 3$  or  $G = 6$ ) and in the case of no DIF and for DIF. Tables A11 to A14 show the average RMSE of group standard deviations as a function of the number of groups ( $G = 3$  or  $G = 6$ ) and in the case of no DIF and for DIF.

Table A1

*Study 1: Average Absolute Bias (ABIAS) of Group Means as a Function of Sample Size in the Condition of No Differential Item Functioning (No DIF) and 3 Groups*

| $p$        | IA1  | IA2  | IA3  | IA4  | HL1  | HL2  | HL3  | HL4  |
|------------|------|------|------|------|------|------|------|------|
| $N = 250$  |      |      |      |      |      |      |      |      |
| 0.02       | .003 | .003 | .001 | .004 | .003 | .003 | .004 | .004 |
| 0.1        | .003 | .003 | .001 | .004 | .002 | .003 | .004 | .004 |
| 0.25       | .003 | .002 | .001 | .004 | .002 | .003 | .003 | .004 |
| 0.5        | .003 | .002 | .000 | .002 | .002 | .002 | .003 | .003 |
| 1          | .002 | .002 | .000 | .002 | .001 | .002 | .003 | .003 |
| 2          | .002 | .002 | .002 | .004 | .001 | .002 | .003 | .004 |
| $N = 500$  |      |      |      |      |      |      |      |      |
| 0.02       | .001 | .001 | .001 | .001 | .001 | .001 | .001 | .001 |
| 0.1        | .001 | .001 | .001 | .001 | .001 | .001 | .001 | .001 |
| 0.25       | .001 | .001 | .001 | .001 | .001 | .001 | .001 | .001 |
| 0.5        | .001 | .001 | .000 | .001 | .001 | .001 | .001 | .001 |
| 1          | .001 | .000 | .000 | .001 | .001 | .001 | .001 | .001 |
| 2          | .001 | .001 | .001 | .001 | .001 | .001 | .001 | .001 |
| $N = 1000$ |      |      |      |      |      |      |      |      |
| 0.02       | .003 | .003 | .004 | .003 | .002 | .003 | .003 | .003 |
| 0.1        | .003 | .003 | .004 | .003 | .002 | .003 | .003 | .003 |
| 0.25       | .003 | .003 | .004 | .003 | .002 | .003 | .003 | .003 |
| 0.5        | .003 | .003 | .004 | .003 | .002 | .003 | .002 | .003 |
| 1          | .003 | .003 | .004 | .003 | .003 | .003 | .003 | .003 |
| 2          | .003 | .003 | .003 | .003 | .003 | .003 | .003 | .003 |
| $N = 5000$ |      |      |      |      |      |      |      |      |
| 0.02       | .002 | .002 | .002 | .002 | .002 | .002 | .002 | .002 |
| 0.1        | .002 | .002 | .002 | .002 | .002 | .002 | .002 | .002 |
| 0.25       | .002 | .002 | .002 | .002 | .002 | .002 | .002 | .002 |
| 0.5        | .002 | .002 | .002 | .002 | .002 | .002 | .002 | .002 |
| 1          | .002 | .002 | .002 | .002 | .002 | .002 | .002 | .002 |
| 2          | .002 | .002 | .002 | .002 | .002 | .002 | .002 | .002 |

*Note.*  $p$  = power used in invariance alignment (IA) or Haberman linking (HL) approaches;  $N$  = sample size; IA1 corresponds to the IA specification proposed by Asparouhov and Muthén [1], and HL3 is the original specification of Haberman [2].

Table A2

*Study 1: Average Absolute Bias (ABIAS) of Group Means as a Function of Sample Size in the Condition of No Differential Item Functioning (No DIF) and 6 Groups*

| $p$        | IA1  | IA2  | IA3  | IA4  | HL1  | HL2  | HL3  | HL4  |
|------------|------|------|------|------|------|------|------|------|
| $N = 250$  |      |      |      |      |      |      |      |      |
| 0.02       | .007 | .007 | .005 | .010 | .008 | .008 | .007 | .007 |
| 0.1        | .007 | .007 | .005 | .010 | .008 | .008 | .007 | .007 |
| 0.25       | .007 | .007 | .006 | .010 | .007 | .008 | .007 | .007 |
| 0.5        | .007 | .007 | .006 | .010 | .007 | .007 | .007 | .007 |
| 1          | .007 | .006 | .007 | .009 | .007 | .006 | .006 | .006 |
| 2          | .006 | .006 | .007 | .008 | .006 | .006 | .005 | .005 |
| $N = 500$  |      |      |      |      |      |      |      |      |
| 0.02       | .005 | .005 | .005 | .004 | .005 | .005 | .005 | .005 |
| 0.1        | .005 | .005 | .005 | .004 | .005 | .005 | .005 | .005 |
| 0.25       | .004 | .005 | .005 | .004 | .005 | .005 | .005 | .005 |
| 0.5        | .004 | .005 | .005 | .004 | .005 | .005 | .004 | .005 |
| 1          | .004 | .004 | .005 | .004 | .005 | .005 | .004 | .004 |
| 2          | .004 | .004 | .005 | .004 | .004 | .004 | .004 | .004 |
| $N = 1000$ |      |      |      |      |      |      |      |      |
| 0.02       | .001 | .001 | .004 | .005 | .002 | .002 | .002 | .002 |
| 0.1        | .001 | .001 | .004 | .005 | .002 | .002 | .002 | .002 |
| 0.25       | .001 | .001 | .003 | .005 | .002 | .002 | .002 | .002 |
| 0.5        | .001 | .001 | .003 | .005 | .002 | .002 | .002 | .002 |
| 1          | .001 | .001 | .003 | .004 | .001 | .001 | .002 | .002 |
| 2          | .001 | .001 | .003 | .004 | .001 | .001 | .002 | .002 |
| $N = 5000$ |      |      |      |      |      |      |      |      |
| 0.02       | .001 | .001 | .001 | .001 | .001 | .001 | .001 | .001 |
| 0.1        | .001 | .001 | .001 | .001 | .001 | .001 | .001 | .001 |
| 0.25       | .001 | .001 | .001 | .001 | .001 | .001 | .001 | .001 |
| 0.5        | .001 | .001 | .001 | .001 | .001 | .001 | .001 | .001 |
| 1          | .001 | .001 | .001 | .001 | .001 | .001 | .001 | .001 |
| 2          | .001 | .001 | .001 | .001 | .001 | .001 | .001 | .001 |

*Note.*  $p$  = power used in invariance alignment (IA) or Haberman linking (HL) approaches;  $N$  = sample size; IA1 corresponds to the IA specification proposed by Asparouhov and Muthén [1], and HL3 is the original specification of Haberman [2].

Table A3

*Study 1: Average Absolute Bias (ABIAS) of Group Means as a Function of Sample Size in the Condition of Differential Item Functioning (DIF) and 3 Groups*

| $p$        | IA1  | IA2  | IA3  | IA4  | HL1  | HL2  | HL3  | HL4  |
|------------|------|------|------|------|------|------|------|------|
| $N = 250$  |      |      |      |      |      |      |      |      |
| 0.02       | .016 | .014 | .044 | .050 | .010 | .011 | .019 | .020 |
| 0.1        | .017 | .014 | .044 | .051 | .010 | .011 | .024 | .024 |
| 0.25       | .017 | .015 | .045 | .051 | .012 | .013 | .022 | .023 |
| 0.5        | .020 | .018 | .047 | .053 | .016 | .017 | .024 | .025 |
| 1          | .036 | .033 | .070 | .081 | .033 | .034 | .044 | .045 |
| 2          | .073 | .057 | .119 | .095 | .061 | .057 | .066 | .070 |
| $N = 500$  |      |      |      |      |      |      |      |      |
| 0.02       | .003 | .002 | .037 | .037 | .001 | .002 | .014 | .015 |
| 0.1        | .004 | .003 | .037 | .038 | .002 | .002 | .014 | .015 |
| 0.25       | .005 | .004 | .039 | .040 | .003 | .003 | .014 | .014 |
| 0.5        | .010 | .010 | .045 | .045 | .006 | .006 | .016 | .017 |
| 1          | .026 | .024 | .073 | .081 | .025 | .026 | .034 | .035 |
| 2          | .071 | .053 | .113 | .087 | .059 | .053 | .060 | .068 |
| $N = 1000$ |      |      |      |      |      |      |      |      |
| 0.02       | .004 | .004 | .038 | .037 | .004 | .004 | .004 | .004 |
| 0.1        | .005 | .005 | .038 | .039 | .004 | .004 | .004 | .004 |
| 0.25       | .007 | .007 | .039 | .040 | .005 | .005 | .005 | .005 |
| 0.5        | .010 | .009 | .040 | .042 | .008 | .008 | .008 | .009 |
| 1          | .022 | .021 | .080 | .086 | .022 | .023 | .030 | .031 |
| 2          | .073 | .055 | .115 | .090 | .062 | .055 | .064 | .071 |
| $N = 5000$ |      |      |      |      |      |      |      |      |
| 0.02       | .001 | .001 | .007 | .008 | .000 | .000 | .000 | .000 |
| 0.1        | .001 | .001 | .008 | .008 | .000 | .000 | .000 | .001 |
| 0.25       | .001 | .001 | .008 | .008 | .001 | .001 | .001 | .001 |
| 0.5        | .003 | .003 | .015 | .015 | .003 | .003 | .003 | .003 |
| 1          | .013 | .012 | .089 | .094 | .015 | .016 | .018 | .018 |
| 2          | .072 | .054 | .113 | .086 | .061 | .054 | .062 | .070 |

*Note.*  $p$  = power used in invariance alignment (IA) or Haberman linking (HL) approaches;  $N$  = sample size; IA1 corresponds to the IA specification proposed by Asparouhov and Muthén [1], and HL3 is the original specification of Haberman [2].

Table A4

*Study 1: Average Absolute Bias (ABIAS) of Group Means as a Function of Sample Size in the Condition of Differential Item Functioning (DIF) and 6 Groups*

| $p$        | IA1  | IA2  | IA3  | IA4  | HL1  | HL2  | HL3  | HL4  |
|------------|------|------|------|------|------|------|------|------|
| $N = 250$  |      |      |      |      |      |      |      |      |
| 0.02       | .011 | .011 | .028 | .032 | .009 | .010 | .014 | .015 |
| 0.1        | .011 | .012 | .029 | .032 | .010 | .011 | .014 | .016 |
| 0.25       | .011 | .012 | .032 | .036 | .012 | .012 | .016 | .016 |
| 0.5        | .015 | .015 | .037 | .042 | .016 | .017 | .020 | .021 |
| 1          | .033 | .031 | .065 | .080 | .032 | .033 | .037 | .038 |
| 2          | .071 | .057 | .114 | .101 | .060 | .057 | .065 | .069 |
| $N = 500$  |      |      |      |      |      |      |      |      |
| 0.02       | .005 | .004 | .038 | .040 | .004 | .004 | .007 | .007 |
| 0.1        | .005 | .004 | .037 | .040 | .005 | .005 | .008 | .008 |
| 0.25       | .006 | .006 | .038 | .041 | .006 | .006 | .009 | .009 |
| 0.5        | .010 | .010 | .045 | .048 | .009 | .010 | .011 | .012 |
| 1          | .027 | .025 | .078 | .091 | .027 | .027 | .030 | .031 |
| 2          | .072 | .056 | .110 | .102 | .062 | .056 | .063 | .070 |
| $N = 1000$ |      |      |      |      |      |      |      |      |
| 0.02       | .004 | .004 | .028 | .033 | .004 | .004 | .006 | .006 |
| 0.1        | .004 | .004 | .031 | .033 | .004 | .004 | .006 | .006 |
| 0.25       | .005 | .005 | .032 | .039 | .005 | .005 | .007 | .007 |
| 0.5        | .008 | .007 | .039 | .048 | .007 | .008 | .009 | .009 |
| 1          | .022 | .020 | .089 | .099 | .022 | .023 | .025 | .026 |
| 2          | .073 | .057 | .111 | .102 | .062 | .057 | .063 | .070 |
| $N = 5000$ |      |      |      |      |      |      |      |      |
| 0.02       | .001 | .001 | .008 | .015 | .001 | .001 | .001 | .001 |
| 0.1        | .001 | .001 | .008 | .021 | .001 | .001 | .001 | .001 |
| 0.25       | .002 | .002 | .013 | .024 | .002 | .002 | .002 | .002 |
| 0.5        | .003 | .003 | .013 | .016 | .003 | .004 | .004 | .004 |
| 1          | .014 | .013 | .089 | .096 | .016 | .016 | .017 | .018 |
| 2          | .072 | .055 | .111 | .098 | .061 | .055 | .063 | .070 |

*Note.*  $p$  = power used in invariance alignment (IA) or Haberman linking (HL) approaches;  $N$  = sample size; IA1 corresponds to the IA specification proposed by Asparouhov and Muthén [1], and HL3 is the original specification of Haberman [2].

Table A5

*Study 1: Average Root Mean Square Error (ARMSE) of Group Means as a Function of Sample Size in the Condition of No Differential Item Functioning (No DIF) and 3 Groups*

| $p$        | IA1  | IA2  | IA3  | IA4  | HL1  | HL2  | HL3  | HL4  |
|------------|------|------|------|------|------|------|------|------|
| $N = 250$  |      |      |      |      |      |      |      |      |
| 0.02       | .052 | .052 | .061 | .061 | .051 | .051 | .052 | .052 |
| 0.1        | .052 | .051 | .060 | .061 | .051 | .051 | .051 | .051 |
| 0.25       | .051 | .051 | .060 | .060 | .051 | .050 | .051 | .050 |
| 0.5        | .051 | .050 | .058 | .058 | .050 | .049 | .050 | .050 |
| 1          | .049 | .049 | .055 | .055 | .049 | .049 | .049 | .049 |
| 2          | .048 | .048 | .054 | .054 | .048 | .048 | .049 | .049 |
| $N = 500$  |      |      |      |      |      |      |      |      |
| 0.02       | .040 | .039 | .044 | .045 | .040 | .040 | .040 | .039 |
| 0.1        | .039 | .039 | .044 | .044 | .040 | .040 | .040 | .039 |
| 0.25       | .039 | .039 | .043 | .044 | .039 | .039 | .039 | .039 |
| 0.5        | .039 | .039 | .043 | .043 | .039 | .039 | .039 | .039 |
| 1          | .038 | .038 | .041 | .041 | .038 | .038 | .038 | .038 |
| 2          | .038 | .038 | .040 | .040 | .038 | .038 | .038 | .038 |
| $N = 1000$ |      |      |      |      |      |      |      |      |
| 0.02       | .026 | .026 | .029 | .029 | .026 | .026 | .026 | .026 |
| 0.1        | .026 | .026 | .029 | .029 | .026 | .026 | .026 | .026 |
| 0.25       | .026 | .026 | .028 | .028 | .025 | .025 | .026 | .026 |
| 0.5        | .025 | .025 | .028 | .028 | .025 | .025 | .026 | .026 |
| 1          | .025 | .025 | .027 | .027 | .025 | .025 | .025 | .025 |
| 2          | .025 | .025 | .026 | .026 | .025 | .025 | .025 | .025 |
| $N = 5000$ |      |      |      |      |      |      |      |      |
| 0.02       | .011 | .011 | .011 | .011 | .011 | .011 | .011 | .011 |
| 0.1        | .011 | .011 | .011 | .011 | .011 | .011 | .011 | .011 |
| 0.25       | .011 | .011 | .011 | .011 | .011 | .011 | .011 | .011 |
| 0.5        | .011 | .011 | .011 | .011 | .011 | .011 | .011 | .011 |
| 1          | .011 | .011 | .011 | .011 | .011 | .011 | .011 | .011 |
| 2          | .011 | .011 | .011 | .011 | .011 | .011 | .011 | .011 |

*Note.*  $p$  = power used in invariance alignment (IA) or Haberman linking (HL) approaches;  $N$  = sample size; IA1 corresponds to the IA specification proposed by Asparouhov and Muthén [1], and HL3 is the original specification of Haberman [2].



Table A6

*Study 1: Average Root Mean Square Error (ARMSE) of Group Means as a Function of Sample Size in the Condition of Differential Item Functioning (DIF) and 3 Groups*

| $p$        | IA1  | IA2  | IA3  | IA4  | HL1  | HL2  | HL3  | HL4  |
|------------|------|------|------|------|------|------|------|------|
| $N = 250$  |      |      |      |      |      |      |      |      |
| 0.02       | .072 | .070 | .111 | .116 | .068 | .067 | .078 | .077 |
| 0.1        | .071 | .069 | .111 | .116 | .068 | .067 | .079 | .078 |
| 0.25       | .069 | .068 | .110 | .114 | .067 | .067 | .076 | .077 |
| 0.5        | .069 | .067 | .107 | .111 | .066 | .066 | .074 | .075 |
| 1          | .071 | .068 | .102 | .111 | .067 | .067 | .075 | .075 |
| 2          | .089 | .080 | .131 | .114 | .081 | .080 | .094 | .093 |
| $N = 500$  |      |      |      |      |      |      |      |      |
| 0.02       | .043 | .043 | .092 | .093 | .042 | .041 | .061 | .060 |
| 0.1        | .043 | .043 | .091 | .093 | .042 | .041 | .060 | .060 |
| 0.25       | .043 | .042 | .090 | .093 | .042 | .042 | .058 | .058 |
| 0.5        | .043 | .043 | .090 | .093 | .042 | .041 | .057 | .057 |
| 1          | .049 | .048 | .091 | .097 | .048 | .048 | .057 | .057 |
| 2          | .080 | .069 | .120 | .098 | .072 | .069 | .079 | .080 |
| $N = 1000$ |      |      |      |      |      |      |      |      |
| 0.02       | .028 | .027 | .083 | .082 | .026 | .026 | .028 | .028 |
| 0.1        | .028 | .028 | .083 | .084 | .026 | .026 | .028 | .028 |
| 0.25       | .028 | .027 | .082 | .084 | .026 | .026 | .028 | .028 |
| 0.5        | .028 | .028 | .080 | .082 | .026 | .026 | .029 | .029 |
| 1          | .035 | .033 | .090 | .096 | .034 | .035 | .045 | .046 |
| 2          | .077 | .065 | .118 | .094 | .067 | .065 | .075 | .078 |
| $N = 5000$ |      |      |      |      |      |      |      |      |
| 0.02       | .011 | .011 | .038 | .038 | .011 | .011 | .011 | .011 |
| 0.1        | .011 | .011 | .038 | .038 | .011 | .011 | .011 | .011 |
| 0.25       | .011 | .011 | .038 | .038 | .011 | .011 | .011 | .011 |
| 0.5        | .011 | .011 | .048 | .049 | .011 | .011 | .012 | .012 |
| 1          | .017 | .017 | .092 | .096 | .019 | .019 | .023 | .023 |
| 2          | .072 | .057 | .114 | .087 | .062 | .057 | .065 | .071 |

*Note.*  $p$  = power used in invariance alignment (IA) or Haberman linking (HL) approaches;  $N$  = sample size; IA1 corresponds to the IA specification proposed by Asparouhov and Muthén [1], and HL3 is the original specification of Haberman [2].

Table A7

*Study 1: Average Absolute Bias (ABIAS) of Group Standard Deviations as a Function of Sample Size in the Condition of No Differential Item Functioning (No DIF) and 3 Groups*

| $p$        | IA1  | IA2  | IA3  | IA4  | HL1  | HL2  | HL3  | HL4  |
|------------|------|------|------|------|------|------|------|------|
| $N = 250$  |      |      |      |      |      |      |      |      |
| 0.02       | .004 | .006 | .006 | .005 | .007 | .004 | .007 | .005 |
| 0.1        | .004 | .006 | .006 | .005 | .006 | .004 | .007 | .004 |
| 0.25       | .004 | .006 | .006 | .005 | .006 | .005 | .007 | .005 |
| 0.5        | .004 | .005 | .005 | .004 | .006 | .005 | .007 | .005 |
| 1          | .003 | .005 | .005 | .004 | .006 | .005 | .006 | .005 |
| 2          | .003 | .005 | .005 | .004 | .006 | .005 | .006 | .005 |
| $N = 500$  |      |      |      |      |      |      |      |      |
| 0.02       | .003 | .002 | .002 | .003 | .002 | .002 | .002 | .002 |
| 0.1        | .003 | .002 | .002 | .002 | .002 | .002 | .002 | .002 |
| 0.25       | .003 | .002 | .002 | .003 | .002 | .002 | .002 | .002 |
| 0.5        | .003 | .002 | .002 | .003 | .002 | .002 | .002 | .002 |
| 1          | .002 | .002 | .002 | .003 | .002 | .002 | .002 | .002 |
| 2          | .002 | .002 | .002 | .002 | .002 | .002 | .002 | .002 |
| $N = 1000$ |      |      |      |      |      |      |      |      |
| 0.02       | .004 | .005 | .004 | .004 | .004 | .005 | .005 | .005 |
| 0.1        | .004 | .005 | .004 | .004 | .004 | .005 | .004 | .005 |
| 0.25       | .004 | .005 | .004 | .004 | .004 | .004 | .004 | .005 |
| 0.5        | .004 | .004 | .004 | .004 | .004 | .004 | .004 | .004 |
| 1          | .003 | .004 | .004 | .003 | .004 | .004 | .004 | .004 |
| 2          | .003 | .003 | .003 | .003 | .003 | .003 | .004 | .004 |
| $N = 5000$ |      |      |      |      |      |      |      |      |
| 0.02       | .000 | .001 | .001 | .001 | .001 | .001 | .001 | .001 |
| 0.1        | .000 | .001 | .001 | .001 | .001 | .001 | .001 | .001 |
| 0.25       | .000 | .001 | .001 | .001 | .001 | .001 | .001 | .001 |
| 0.5        | .000 | .001 | .001 | .001 | .001 | .001 | .001 | .001 |
| 1          | .001 | .001 | .001 | .001 | .001 | .001 | .001 | .001 |
| 2          | .001 | .001 | .001 | .001 | .001 | .001 | .001 | .001 |

*Note.*  $p$  = power used in invariance alignment (IA) or Haberman linking (HL) approaches;  $N$  = sample size; IA1 corresponds to the IA specification proposed by Asparouhov and Muthén [1], and HL3 is the original specification of Haberman [2].

Table A8

*Study 1: Average Absolute Bias (ABIAS) of Group Standard Deviations as a Function of Sample Size in the Condition of No Differential Item Functioning (No DIF) and 6 Groups*

| $p$        | IA1  | IA2  | IA3  | IA4  | HL1  | HL2  | HL3  | HL4  |
|------------|------|------|------|------|------|------|------|------|
| $N = 250$  |      |      |      |      |      |      |      |      |
| 0.02       | .005 | .003 | .005 | .008 | .005 | .004 | .005 | .004 |
| 0.1        | .005 | .003 | .005 | .008 | .005 | .004 | .005 | .004 |
| 0.25       | .005 | .003 | .005 | .008 | .005 | .004 | .005 | .004 |
| 0.5        | .005 | .003 | .005 | .008 | .004 | .004 | .005 | .004 |
| 1          | .005 | .003 | .004 | .007 | .004 | .003 | .004 | .004 |
| 2          | .005 | .003 | .004 | .006 | .003 | .003 | .004 | .004 |
| $N = 500$  |      |      |      |      |      |      |      |      |
| 0.02       | .004 | .003 | .003 | .004 | .003 | .003 | .003 | .003 |
| 0.1        | .004 | .003 | .003 | .004 | .003 | .003 | .003 | .003 |
| 0.25       | .004 | .003 | .003 | .004 | .003 | .003 | .003 | .003 |
| 0.5        | .004 | .003 | .003 | .004 | .003 | .003 | .003 | .003 |
| 1          | .004 | .003 | .003 | .004 | .003 | .003 | .003 | .003 |
| 2          | .004 | .003 | .003 | .004 | .003 | .003 | .003 | .003 |
| $N = 1000$ |      |      |      |      |      |      |      |      |
| 0.02       | .002 | .002 | .003 | .003 | .002 | .002 | .002 | .002 |
| 0.1        | .002 | .002 | .003 | .003 | .002 | .002 | .002 | .002 |
| 0.25       | .002 | .002 | .002 | .003 | .002 | .002 | .002 | .002 |
| 0.5        | .002 | .002 | .002 | .003 | .002 | .002 | .002 | .002 |
| 1          | .002 | .002 | .002 | .003 | .002 | .002 | .002 | .002 |
| 2          | .002 | .002 | .002 | .003 | .002 | .002 | .002 | .002 |
| $N = 5000$ |      |      |      |      |      |      |      |      |
| 0.02       | .001 | .001 | .001 | .001 | .001 | .001 | .001 | .001 |
| 0.1        | .001 | .001 | .001 | .001 | .001 | .001 | .001 | .001 |
| 0.25       | .001 | .001 | .001 | .001 | .001 | .001 | .001 | .001 |
| 0.5        | .001 | .001 | .001 | .001 | .001 | .001 | .001 | .001 |
| 1          | .001 | .001 | .001 | .001 | .001 | .001 | .001 | .001 |
| 2          | .001 | .001 | .001 | .001 | .001 | .001 | .001 | .001 |

*Note.*  $p$  = power used in invariance alignment (IA) or Haberman linking (HL) approaches;  $N$  = sample size; IA1 corresponds to the IA specification proposed by Asparouhov and Muthén [1], and HL3 is the original specification of Haberman [2].

Table A9

*Study 1: Average Absolute Bias (ABIAS) of Group Standard Deviations as a Function of Sample Size in the Condition of Differential Item Functioning (DIF) and 3 Groups*

| $p$        | IA1  | IA2  | IA3  | IA4  | HL1  | HL2  | HL3  | HL4  |
|------------|------|------|------|------|------|------|------|------|
| $N = 250$  |      |      |      |      |      |      |      |      |
| 0.02       | .009 | .014 | .017 | .022 | .013 | .012 | .016 | .014 |
| 0.1        | .009 | .014 | .018 | .022 | .014 | .013 | .017 | .015 |
| 0.25       | .008 | .015 | .018 | .020 | .014 | .013 | .016 | .016 |
| 0.5        | .009 | .018 | .021 | .019 | .017 | .016 | .019 | .018 |
| 1          | .012 | .035 | .035 | .019 | .037 | .037 | .037 | .037 |
| 2          | .020 | .101 | .094 | .019 | .083 | .101 | .082 | .100 |
| $N = 500$  |      |      |      |      |      |      |      |      |
| 0.02       | .007 | .010 | .013 | .011 | .009 | .009 | .011 | .011 |
| 0.1        | .008 | .011 | .014 | .011 | .009 | .009 | .011 | .011 |
| 0.25       | .008 | .013 | .015 | .011 | .010 | .010 | .012 | .012 |
| 0.5        | .010 | .016 | .018 | .013 | .013 | .013 | .014 | .015 |
| 1          | .014 | .032 | .033 | .018 | .032 | .034 | .033 | .034 |
| 2          | .027 | .105 | .098 | .025 | .088 | .105 | .086 | .104 |
| $N = 1000$ |      |      |      |      |      |      |      |      |
| 0.02       | .002 | .002 | .009 | .010 | .001 | .001 | .001 | .001 |
| 0.1        | .002 | .002 | .009 | .010 | .001 | .001 | .001 | .001 |
| 0.25       | .002 | .003 | .008 | .010 | .002 | .001 | .002 | .002 |
| 0.5        | .003 | .006 | .008 | .009 | .004 | .004 | .004 | .004 |
| 1          | .006 | .019 | .021 | .015 | .021 | .022 | .021 | .022 |
| 2          | .023 | .101 | .094 | .022 | .083 | .101 | .081 | .100 |
| $N = 5000$ |      |      |      |      |      |      |      |      |
| 0.02       | .000 | .001 | .001 | .001 | .001 | .001 | .001 | .001 |
| 0.1        | .000 | .001 | .001 | .001 | .001 | .001 | .001 | .001 |
| 0.25       | .001 | .002 | .002 | .001 | .001 | .002 | .001 | .002 |
| 0.5        | .001 | .003 | .004 | .002 | .003 | .003 | .003 | .003 |
| 1          | .005 | .014 | .017 | .013 | .016 | .018 | .016 | .017 |
| 2          | .025 | .103 | .096 | .023 | .085 | .103 | .083 | .101 |

*Note.*  $p$  = power used in invariance alignment (IA) or Haberman linking (HL) approaches;  $N$  = sample size; IA1 corresponds to the IA specification proposed by Asparouhov and Muthén [1], and HL3 is the original specification of Haberman [2].

Table A10

*Study 1: Average Absolute Bias (ABIAS) of Group Standard Deviations as a Function of Sample Size in the Condition of Differential Item Functioning (DIF) and 6 Groups*

| $p$        | IA1  | IA2  | IA3  | IA4  | HL1  | HL2  | HL3  | HL4  |
|------------|------|------|------|------|------|------|------|------|
| $N = 250$  |      |      |      |      |      |      |      |      |
| 0.02       | .008 | .011 | .014 | .016 | .013 | .013 | .014 | .014 |
| 0.1        | .008 | .012 | .014 | .015 | .013 | .013 | .014 | .014 |
| 0.25       | .009 | .013 | .015 | .016 | .015 | .015 | .015 | .015 |
| 0.5        | .011 | .018 | .019 | .018 | .019 | .018 | .020 | .019 |
| 1          | .022 | .038 | .037 | .029 | .041 | .041 | .041 | .042 |
| 2          | .048 | .105 | .099 | .055 | .088 | .105 | .088 | .104 |
| $N = 500$  |      |      |      |      |      |      |      |      |
| 0.02       | .005 | .003 | .011 | .014 | .003 | .003 | .004 | .004 |
| 0.1        | .005 | .003 | .011 | .014 | .003 | .003 | .004 | .004 |
| 0.25       | .005 | .003 | .010 | .014 | .003 | .003 | .004 | .004 |
| 0.5        | .007 | .007 | .010 | .015 | .006 | .006 | .007 | .006 |
| 1          | .015 | .023 | .025 | .025 | .025 | .027 | .025 | .026 |
| 2          | .048 | .099 | .092 | .056 | .081 | .099 | .080 | .098 |
| $N = 1000$ |      |      |      |      |      |      |      |      |
| 0.02       | .004 | .003 | .007 | .010 | .003 | .003 | .003 | .003 |
| 0.1        | .004 | .003 | .007 | .009 | .003 | .003 | .003 | .003 |
| 0.25       | .004 | .003 | .007 | .010 | .003 | .003 | .004 | .004 |
| 0.5        | .006 | .006 | .008 | .011 | .006 | .005 | .006 | .006 |
| 1          | .014 | .021 | .023 | .023 | .023 | .024 | .023 | .024 |
| 2          | .049 | .102 | .095 | .056 | .084 | .102 | .082 | .100 |
| $N = 5000$ |      |      |      |      |      |      |      |      |
| 0.02       | .001 | .001 | .001 | .003 | .001 | .001 | .001 | .001 |
| 0.1        | .001 | .001 | .002 | .004 | .001 | .001 | .001 | .001 |
| 0.25       | .001 | .002 | .002 | .004 | .002 | .002 | .002 | .002 |
| 0.5        | .002 | .003 | .004 | .003 | .003 | .004 | .003 | .004 |
| 1          | .008 | .014 | .017 | .016 | .016 | .018 | .016 | .018 |
| 2          | .048 | .103 | .096 | .054 | .085 | .103 | .083 | .101 |

*Note.*  $p$  = power used in invariance alignment (IA) or Haberman linking (HL) approaches;  $N$  = sample size; IA1 corresponds to the IA specification proposed by Asparouhov and Muthén [1], and HL3 is the original specification of Haberman [2].

Table A11

*Study 1: Average Root Mean Square Error (ARMSE) of Group Standard Deviations as a Function of Sample Size in the Condition of No Differential Item Functioning (No DIF) and 3 Groups*

| $p$        | IA1  | IA2  | IA3  | IA4  | HL1  | HL2  | HL3  | HL4  |
|------------|------|------|------|------|------|------|------|------|
| $N = 250$  |      |      |      |      |      |      |      |      |
| 0.02       | .046 | .046 | .047 | .047 | .045 | .047 | .045 | .047 |
| 0.1        | .046 | .046 | .047 | .047 | .044 | .046 | .045 | .046 |
| 0.25       | .045 | .045 | .046 | .046 | .044 | .045 | .044 | .045 |
| 0.5        | .044 | .044 | .045 | .045 | .043 | .044 | .043 | .044 |
| 1          | .042 | .042 | .043 | .043 | .041 | .042 | .041 | .042 |
| 2          | .041 | .041 | .042 | .042 | .040 | .041 | .040 | .041 |
| $N = 500$  |      |      |      |      |      |      |      |      |
| 0.02       | .035 | .034 | .035 | .036 | .033 | .033 | .033 | .033 |
| 0.1        | .035 | .034 | .035 | .035 | .033 | .033 | .033 | .033 |
| 0.25       | .034 | .033 | .034 | .035 | .032 | .033 | .032 | .033 |
| 0.5        | .033 | .033 | .033 | .034 | .031 | .032 | .031 | .032 |
| 1          | .032 | .031 | .032 | .032 | .030 | .031 | .030 | .031 |
| 2          | .030 | .030 | .031 | .031 | .029 | .030 | .029 | .030 |
| $N = 1000$ |      |      |      |      |      |      |      |      |
| 0.02       | .023 | .023 | .024 | .024 | .023 | .023 | .023 | .023 |
| 0.1        | .023 | .023 | .024 | .023 | .022 | .023 | .023 | .023 |
| 0.25       | .023 | .023 | .023 | .023 | .022 | .023 | .022 | .023 |
| 0.5        | .022 | .023 | .023 | .023 | .022 | .022 | .022 | .022 |
| 1          | .022 | .022 | .022 | .022 | .021 | .022 | .021 | .022 |
| 2          | .022 | .022 | .022 | .022 | .021 | .022 | .021 | .022 |
| $N = 5000$ |      |      |      |      |      |      |      |      |
| 0.02       | .009 | .009 | .009 | .009 | .008 | .009 | .008 | .009 |
| 0.1        | .009 | .009 | .009 | .009 | .008 | .009 | .008 | .009 |
| 0.25       | .009 | .009 | .009 | .009 | .008 | .009 | .008 | .009 |
| 0.5        | .009 | .009 | .009 | .009 | .008 | .009 | .008 | .009 |
| 1          | .009 | .009 | .009 | .009 | .008 | .009 | .008 | .009 |
| 2          | .009 | .009 | .009 | .009 | .008 | .009 | .008 | .009 |

*Note.*  $p$  = power used in invariance alignment (IA) or Haberman linking (HL) approaches;  $N$  = sample size; IA1 corresponds to the IA specification proposed by Asparouhov and Muthén [1], and HL3 is the original specification of Haberman [2].

Table A12

*Study 1: Average Root Mean Square Error (ARMSE) of Group Standard Deviations as a Function of Sample Size in the Condition of No Differential Item Functioning (No DIF) and 6 Groups*

| $p$        | IA1  | IA2  | IA3  | IA4  | HL1  | HL2  | HL3  | HL4  |
|------------|------|------|------|------|------|------|------|------|
| $N = 250$  |      |      |      |      |      |      |      |      |
| 0.02       | .050 | .049 | .050 | .052 | .048 | .049 | .049 | .049 |
| 0.1        | .050 | .048 | .049 | .051 | .048 | .049 | .048 | .049 |
| 0.25       | .049 | .047 | .049 | .050 | .048 | .048 | .048 | .048 |
| 0.5        | .047 | .046 | .048 | .049 | .047 | .047 | .047 | .047 |
| 1          | .045 | .045 | .046 | .046 | .044 | .045 | .044 | .045 |
| 2          | .044 | .044 | .045 | .045 | .043 | .044 | .043 | .044 |
| $N = 500$  |      |      |      |      |      |      |      |      |
| 0.02       | .034 | .034 | .035 | .034 | .035 | .034 | .035 | .034 |
| 0.1        | .034 | .034 | .034 | .034 | .034 | .034 | .034 | .034 |
| 0.25       | .034 | .034 | .034 | .034 | .034 | .034 | .034 | .034 |
| 0.5        | .033 | .033 | .033 | .033 | .033 | .034 | .033 | .033 |
| 1          | .033 | .033 | .033 | .033 | .032 | .033 | .032 | .033 |
| 2          | .032 | .032 | .033 | .033 | .032 | .032 | .032 | .032 |
| $N = 1000$ |      |      |      |      |      |      |      |      |
| 0.02       | .024 | .024 | .025 | .025 | .024 | .025 | .024 | .025 |
| 0.1        | .024 | .024 | .025 | .025 | .024 | .024 | .024 | .024 |
| 0.25       | .024 | .024 | .025 | .025 | .024 | .024 | .024 | .024 |
| 0.5        | .024 | .024 | .024 | .024 | .023 | .024 | .023 | .024 |
| 1          | .023 | .023 | .024 | .024 | .023 | .024 | .023 | .024 |
| 2          | .023 | .023 | .024 | .024 | .023 | .023 | .023 | .023 |
| $N = 5000$ |      |      |      |      |      |      |      |      |
| 0.02       | .010 | .010 | .011 | .011 | .010 | .010 | .010 | .010 |
| 0.1        | .010 | .010 | .011 | .010 | .010 | .010 | .010 | .010 |
| 0.25       | .010 | .010 | .011 | .010 | .010 | .010 | .010 | .010 |
| 0.5        | .010 | .010 | .010 | .010 | .010 | .010 | .010 | .010 |
| 1          | .010 | .010 | .010 | .010 | .010 | .010 | .010 | .010 |
| 2          | .010 | .010 | .010 | .010 | .010 | .010 | .010 | .010 |

*Note.*  $p$  = power used in invariance alignment (IA) or Haberman linking (HL) approaches;  $N$  = sample size; IA1 corresponds to the IA specification proposed by Asparouhov and Muthén [1], and HL3 is the original specification of Haberman [2].

Table A13

*Study 1: Average Root Mean Square Error (ARMSE) of Group Standard Deviations as a Function of Sample Size in the Condition of Differential Item Functioning (DIF) and 3 Groups*

| $p$        | IA1  | IA2  | IA3  | IA4  | HL1  | HL2  | HL3  | HL4  |
|------------|------|------|------|------|------|------|------|------|
| $N = 250$  |      |      |      |      |      |      |      |      |
| 0.02       | .051 | .055 | .061 | .059 | .057 | .057 | .058 | .058 |
| 0.1        | .051 | .055 | .061 | .058 | .056 | .056 | .058 | .057 |
| 0.25       | .050 | .054 | .060 | .058 | .055 | .055 | .056 | .056 |
| 0.5        | .050 | .054 | .059 | .056 | .055 | .054 | .056 | .055 |
| 1          | .047 | .060 | .061 | .052 | .062 | .060 | .062 | .061 |
| 2          | .048 | .116 | .115 | .049 | .097 | .116 | .097 | .115 |
| $N = 500$  |      |      |      |      |      |      |      |      |
| 0.02       | .035 | .035 | .041 | .041 | .034 | .034 | .038 | .038 |
| 0.1        | .034 | .035 | .040 | .040 | .034 | .034 | .038 | .038 |
| 0.25       | .034 | .036 | .040 | .040 | .035 | .034 | .038 | .037 |
| 0.5        | .034 | .037 | .041 | .039 | .035 | .035 | .038 | .038 |
| 1          | .034 | .046 | .047 | .039 | .047 | .047 | .048 | .047 |
| 2          | .040 | .111 | .108 | .040 | .094 | .111 | .093 | .110 |
| $N = 1000$ |      |      |      |      |      |      |      |      |
| 0.02       | .024 | .025 | .029 | .029 | .023 | .023 | .023 | .024 |
| 0.1        | .024 | .024 | .029 | .029 | .023 | .023 | .023 | .023 |
| 0.25       | .023 | .024 | .028 | .028 | .023 | .023 | .023 | .023 |
| 0.5        | .023 | .024 | .028 | .028 | .023 | .023 | .023 | .023 |
| 1          | .023 | .030 | .032 | .028 | .031 | .032 | .032 | .033 |
| 2          | .030 | .105 | .101 | .030 | .086 | .105 | .085 | .104 |
| $N = 5000$ |      |      |      |      |      |      |      |      |
| 0.02       | .010 | .010 | .012 | .012 | .009 | .009 | .009 | .009 |
| 0.1        | .010 | .009 | .012 | .012 | .009 | .009 | .009 | .009 |
| 0.25       | .009 | .010 | .012 | .012 | .009 | .009 | .009 | .009 |
| 0.5        | .009 | .010 | .013 | .013 | .009 | .010 | .009 | .010 |
| 1          | .010 | .017 | .019 | .017 | .018 | .020 | .018 | .020 |
| 2          | .026 | .104 | .098 | .025 | .085 | .104 | .084 | .102 |

*Note.*  $p$  = power used in invariance alignment (IA) or Haberman linking (HL) approaches;  $N$  = sample size; IA1 corresponds to the IA specification proposed by Asparouhov and Muthén [1], and HL3 is the original specification of Haberman [2].



Table A14

*Study 1: Average Root Mean Square Error (ARMSE) of Group Standard Deviations as a Function of Sample Size in the Condition of Differential Item Functioning (DIF) and 6 Groups*

| $p$        | IA1  | IA2  | IA3  | IA4  | HL1  | HL2  | HL3  | HL4  |
|------------|------|------|------|------|------|------|------|------|
| $N = 250$  |      |      |      |      |      |      |      |      |
| 0.02       | .057 | .059 | .062 | .061 | .062 | .059 | .062 | .060 |
| 0.1        | .057 | .059 | .061 | .060 | .061 | .059 | .062 | .060 |
| 0.25       | .056 | .058 | .061 | .060 | .061 | .059 | .062 | .060 |
| 0.5        | .055 | .058 | .060 | .060 | .062 | .059 | .062 | .060 |
| 1          | .057 | .066 | .067 | .060 | .073 | .069 | .073 | .070 |
| 2          | .071 | .123 | .123 | .075 | .107 | .123 | .107 | .123 |
| $N = 500$  |      |      |      |      |      |      |      |      |
| 0.02       | .036 | .036 | .041 | .041 | .037 | .037 | .037 | .038 |
| 0.1        | .036 | .035 | .040 | .041 | .037 | .037 | .037 | .037 |
| 0.25       | .035 | .035 | .040 | .041 | .036 | .036 | .037 | .037 |
| 0.5        | .035 | .035 | .039 | .041 | .036 | .036 | .036 | .036 |
| 1          | .037 | .041 | .043 | .043 | .045 | .044 | .045 | .044 |
| 2          | .060 | .108 | .106 | .066 | .089 | .108 | .089 | .107 |
| $N = 1000$ |      |      |      |      |      |      |      |      |
| 0.02       | .026 | .026 | .029 | .030 | .025 | .025 | .025 | .026 |
| 0.1        | .026 | .025 | .029 | .030 | .025 | .025 | .025 | .025 |
| 0.25       | .025 | .025 | .029 | .030 | .025 | .025 | .025 | .025 |
| 0.5        | .025 | .025 | .028 | .030 | .025 | .025 | .026 | .026 |
| 1          | .028 | .032 | .034 | .034 | .035 | .035 | .035 | .035 |
| 2          | .056 | .106 | .103 | .061 | .088 | .106 | .087 | .105 |
| $N = 5000$ |      |      |      |      |      |      |      |      |
| 0.02       | .010 | .010 | .013 | .015 | .010 | .010 | .010 | .010 |
| 0.1        | .010 | .010 | .013 | .016 | .010 | .010 | .010 | .011 |
| 0.25       | .010 | .011 | .014 | .016 | .010 | .011 | .011 | .011 |
| 0.5        | .011 | .011 | .013 | .014 | .011 | .011 | .011 | .011 |
| 1          | .013 | .017 | .020 | .020 | .020 | .021 | .019 | .021 |
| 2          | .050 | .104 | .098 | .055 | .086 | .104 | .084 | .102 |

*Note.*  $p$  = power used in invariance alignment (IA) or Haberman linking (HL) approaches;  $N$  = sample size; IA1 corresponds to the IA specification proposed by Asparouhov and Muthén [1], and HL3 is the original specification of Haberman [2].

## Supplement B: Additional Results for Study 2

The following pages contain additional results for Simulation Study 2. Tables B1 to B4 show the average absolute bias as a function of the number of groups ( $G = 3$  or  $6$ ) and no DIF and the presence of DIF. Table B5 shows the average absolute RMSE for  $G = 3$  groups in the condition of no DIF.

The following pages contain additional results for Simulation Study 2. Tables B1 to B4 show the average absolute bias of group means as a function of the number of groups ( $G = 3$  or  $G = 6$ ) and in the case of no DIF and for DIF. Table B5 shows the average RMSE for  $G = 3$  groups in the condition of no DIF. Tables B6 to B9 show the average absolute bias of group standard deviations as a function of the number of groups ( $G = 3$  or  $G = 6$ ) and in the case of no DIF and for DIF. Tables B10 to B13 show the average RMSE of group standard deviations as a function of the number of groups ( $G = 3$  or  $G = 6$ ) and in the case of no DIF and for DIF.

Table B1

*Study 2: Average Absolute Bias (ABIAS) of Group Means as a Function of Sample Size in the Condition of No Differential Item Functioning (No DIF) and 3 Groups*

| $p$        | IA1  | IA2  | IA3  | IA4  | HL1  | HL2  | HL3  | HL4  |
|------------|------|------|------|------|------|------|------|------|
| $N = 250$  |      |      |      |      |      |      |      |      |
| 0.02       | .016 | .012 | .024 | .003 | .010 | .011 | .010 | .008 |
| 0.1        | .015 | .013 | .022 | .004 | .010 | .011 | .008 | .006 |
| 0.25       | .016 | .013 | .022 | .002 | .011 | .012 | .008 | .006 |
| 0.5        | .016 | .013 | .022 | .002 | .012 | .013 | .007 | .006 |
| 1          | .016 | .014 | .022 | .005 | .014 | .014 | .009 | .010 |
| 2          | .019 | .017 | .011 | .020 | .017 | .017 | .019 | .019 |
| $N = 500$  |      |      |      |      |      |      |      |      |
| 0.02       | .003 | .006 | .017 | .009 | .006 | .006 | .005 | .006 |
| 0.1        | .003 | .006 | .018 | .008 | .006 | .006 | .005 | .005 |
| 0.25       | .003 | .006 | .017 | .008 | .006 | .006 | .003 | .004 |
| 0.5        | .003 | .006 | .017 | .007 | .006 | .006 | .003 | .003 |
| 1          | .003 | .005 | .013 | .004 | .005 | .005 | .003 | .003 |
| 2          | .003 | .005 | .004 | .006 | .006 | .005 | .007 | .007 |
| $N = 1000$ |      |      |      |      |      |      |      |      |
| 0.02       | .002 | .004 | .020 | .014 | .003 | .003 | .006 | .007 |
| 0.1        | .002 | .003 | .020 | .014 | .003 | .003 | .006 | .007 |
| 0.25       | .002 | .003 | .019 | .014 | .003 | .003 | .005 | .006 |
| 0.5        | .001 | .003 | .019 | .013 | .003 | .002 | .005 | .005 |
| 1          | .002 | .003 | .015 | .011 | .003 | .003 | .004 | .004 |
| 2          | .002 | .003 | .009 | .004 | .003 | .003 | .001 | .001 |
| $N = 5000$ |      |      |      |      |      |      |      |      |
| 0.02       | .001 | .001 | .018 | .017 | .001 | .001 | .000 | .001 |
| 0.1        | .001 | .001 | .018 | .017 | .001 | .001 | .000 | .001 |
| 0.25       | .001 | .001 | .017 | .017 | .001 | .001 | .000 | .001 |
| 0.5        | .001 | .001 | .016 | .015 | .001 | .001 | .000 | .000 |
| 1          | .001 | .001 | .012 | .012 | .001 | .001 | .000 | .001 |
| 2          | .000 | .000 | .005 | .004 | .000 | .000 | .000 | .001 |

*Note.*  $p$  = power used in invariance alignment (IA) or Haberman linking (HL) approaches;  $N$  = sample size; IA1 corresponds to the IA specification proposed by Asparouhov and Muthén [1], and HL3 is the original specification of Haberman [2].

Table B2

*Study 2: Average Absolute Bias (ABIAS) of Group Means as a Function of Sample Size in the Condition of No Differential Item Functioning (No DIF) and 6 Groups*

| $p$        | IA1  | IA2  | IA3  | IA4  | HL1  | HL2  | HL3  | HL4  |
|------------|------|------|------|------|------|------|------|------|
| $N = 250$  |      |      |      |      |      |      |      |      |
| 0.02       | .004 | .010 | .047 | .041 | .010 | .010 | .012 | .018 |
| 0.1        | .007 | .010 | .047 | .049 | .009 | .010 | .011 | .017 |
| 0.25       | .008 | .011 | .049 | .084 | .010 | .010 | .011 | .014 |
| 0.5        | .006 | .012 | .046 | .073 | .010 | .011 | .009 | .013 |
| 1          | .007 | .013 | .043 | .056 | .013 | .014 | .008 | .008 |
| 2          | .009 | .017 | .043 | .076 | .015 | .017 | .034 | .030 |
| $N = 500$  |      |      |      |      |      |      |      |      |
| 0.02       | .004 | .008 | .031 | .019 | .007 | .009 | .005 | .004 |
| 0.1        | .003 | .008 | .031 | .018 | .006 | .009 | .004 | .004 |
| 0.25       | .003 | .008 | .031 | .017 | .006 | .008 | .004 | .004 |
| 0.5        | .003 | .008 | .031 | .017 | .006 | .008 | .003 | .003 |
| 1          | .002 | .008 | .030 | .015 | .006 | .007 | .004 | .003 |
| 2          | .003 | .008 | .021 | .028 | .008 | .008 | .009 | .007 |
| $N = 1000$ |      |      |      |      |      |      |      |      |
| 0.02       | .005 | .006 | .027 | .004 | .005 | .006 | .004 | .005 |
| 0.1        | .005 | .007 | .027 | .004 | .005 | .006 | .004 | .005 |
| 0.25       | .005 | .007 | .026 | .004 | .004 | .006 | .004 | .004 |
| 0.5        | .005 | .007 | .025 | .004 | .004 | .006 | .004 | .004 |
| 1          | .005 | .007 | .021 | .004 | .004 | .006 | .004 | .004 |
| 2          | .005 | .007 | .014 | .014 | .005 | .007 | .006 | .006 |
| $N = 5000$ |      |      |      |      |      |      |      |      |
| 0.02       | .001 | .002 | .034 | .030 | .003 | .002 | .002 | .002 |
| 0.1        | .001 | .002 | .033 | .029 | .003 | .002 | .002 | .002 |
| 0.25       | .001 | .002 | .032 | .028 | .003 | .002 | .002 | .002 |
| 0.5        | .001 | .002 | .029 | .025 | .003 | .002 | .002 | .002 |
| 1          | .001 | .002 | .020 | .016 | .003 | .002 | .003 | .002 |
| 2          | .001 | .002 | .008 | .004 | .002 | .002 | .004 | .002 |

*Note.*  $p$  = power used in invariance alignment (IA) or Haberman linking (HL) approaches;  $N$  = sample size; IA1 corresponds to the IA specification proposed by Asparouhov and Muthén [1], and HL3 is the original specification of Haberman [2].

Table B3

*Study 2: Average Absolute Bias (ABIAS) of Group Means as a Function of Sample Size in the Condition of Differential Item Functioning (DIF) and 3 Groups*

| $p$        | IA1  | IA2  | IA3  | IA4  | HL1  | HL2  | HL3  | HL4  |
|------------|------|------|------|------|------|------|------|------|
| $N = 250$  |      |      |      |      |      |      |      |      |
| 0.02       | .081 | .079 | .082 | .090 | .095 | .095 | .115 | .112 |
| 0.1        | .081 | .079 | .085 | .091 | .096 | .096 | .117 | .112 |
| 0.25       | .083 | .081 | .083 | .093 | .098 | .099 | .119 | .116 |
| 0.5        | .094 | .093 | .091 | .102 | .099 | .099 | .121 | .122 |
| 1          | .115 | .112 | .108 | .112 | .112 | .112 | .133 | .133 |
| 2          | .139 | .136 | .133 | .140 | .136 | .136 | .165 | .165 |
| $N = 500$  |      |      |      |      |      |      |      |      |
| 0.02       | .037 | .037 | .066 | .069 | .048 | .047 | .076 | .078 |
| 0.1        | .039 | .038 | .067 | .070 | .050 | .050 | .077 | .082 |
| 0.25       | .044 | .043 | .072 | .075 | .054 | .055 | .078 | .083 |
| 0.5        | .052 | .051 | .082 | .085 | .061 | .062 | .090 | .093 |
| 1          | .095 | .094 | .107 | .110 | .094 | .094 | .119 | .119 |
| 2          | .142 | .140 | .144 | .148 | .140 | .140 | .164 | .164 |
| $N = 1000$ |      |      |      |      |      |      |      |      |
| 0.02       | .018 | .018 | .046 | .043 | .025 | .026 | .054 | .053 |
| 0.1        | .019 | .019 | .047 | .045 | .026 | .026 | .053 | .052 |
| 0.25       | .024 | .024 | .050 | .049 | .029 | .029 | .059 | .059 |
| 0.5        | .033 | .033 | .059 | .059 | .036 | .036 | .069 | .069 |
| 1          | .076 | .076 | .100 | .100 | .077 | .078 | .110 | .110 |
| 2          | .144 | .144 | .150 | .151 | .144 | .144 | .167 | .167 |
| $N = 5000$ |      |      |      |      |      |      |      |      |
| 0.02       | .002 | .002 | .029 | .027 | .002 | .002 | .003 | .003 |
| 0.1        | .002 | .002 | .029 | .028 | .002 | .002 | .004 | .003 |
| 0.25       | .004 | .004 | .029 | .028 | .003 | .004 | .006 | .005 |
| 0.5        | .008 | .008 | .030 | .029 | .008 | .008 | .011 | .011 |
| 1          | .038 | .038 | .068 | .068 | .041 | .042 | .063 | .063 |
| 2          | .141 | .141 | .147 | .147 | .140 | .141 | .160 | .160 |

*Note.*  $p$  = power used in invariance alignment (IA) or Haberman linking (HL) approaches;  $N$  = sample size; IA1 corresponds to the IA specification proposed by Asparouhov and Muthén [1], and HL3 is the original specification of Haberman [2].

Table B4

*Study 2: Average Absolute Bias (ABIAS) of Group Means as a Function of Sample Size in the Condition of Differential Item Functioning (DIF) and 6 Groups*

| $p$        | IA1  | IA2  | IA3  | IA4  | HL1  | HL2  | HL3  | HL4  |
|------------|------|------|------|------|------|------|------|------|
| $N = 250$  |      |      |      |      |      |      |      |      |
| 0.02       | .106 | .111 | .118 | .109 | .070 | .070 | .094 | .090 |
| 0.1        | .104 | .112 | .119 | .112 | .069 | .070 | .095 | .092 |
| 0.25       | .106 | .115 | .123 | .113 | .071 | .071 | .098 | .089 |
| 0.5        | .112 | .117 | .125 | .120 | .078 | .079 | .096 | .093 |
| 1          | .119 | .125 | .137 | .124 | .092 | .093 | .106 | .107 |
| 2          | .133 | .138 | .155 | .145 | .137 | .138 | .146 | .147 |
| $N = 500$  |      |      |      |      |      |      |      |      |
| 0.02       | .072 | .075 | .102 | .089 | .029 | .030 | .049 | .051 |
| 0.1        | .073 | .076 | .104 | .088 | .030 | .031 | .052 | .056 |
| 0.25       | .079 | .081 | .107 | .092 | .033 | .034 | .057 | .060 |
| 0.5        | .090 | .093 | .114 | .096 | .041 | .042 | .063 | .062 |
| 1          | .115 | .118 | .130 | .111 | .071 | .072 | .087 | .088 |
| 2          | .137 | .140 | .153 | .135 | .139 | .140 | .148 | .149 |
| $N = 1000$ |      |      |      |      |      |      |      |      |
| 0.02       | .028 | .031 | .081 | .080 | .015 | .016 | .023 | .019 |
| 0.1        | .031 | .033 | .084 | .081 | .015 | .016 | .025 | .023 |
| 0.25       | .036 | .038 | .090 | .080 | .018 | .019 | .029 | .028 |
| 0.5        | .050 | .050 | .101 | .094 | .024 | .025 | .037 | .036 |
| 1          | .106 | .107 | .129 | .119 | .054 | .055 | .070 | .071 |
| 2          | .139 | .141 | .153 | .143 | .140 | .141 | .155 | .156 |
| $N = 5000$ |      |      |      |      |      |      |      |      |
| 0.02       | .003 | .004 | .052 | .048 | .002 | .003 | .003 | .003 |
| 0.1        | .004 | .004 | .052 | .049 | .002 | .003 | .003 | .003 |
| 0.25       | .006 | .006 | .053 | .049 | .003 | .004 | .004 | .005 |
| 0.5        | .011 | .011 | .056 | .054 | .006 | .007 | .009 | .009 |
| 1          | .061 | .062 | .112 | .110 | .027 | .028 | .036 | .037 |
| 2          | .139 | .139 | .148 | .146 | .139 | .139 | .152 | .153 |

*Note.*  $p$  = power used in invariance alignment (IA) or Haberman linking (HL) approaches;  $N$  = sample size; IA1 corresponds to the IA specification proposed by Asparouhov and Muthén [1], and HL3 is the original specification of Haberman [2].

Table B5

*Study 2: Average Root Mean Square Error (ARMSE) of Group Means as a Function of Sample Size in the Condition of No Differential Item Functioning (No DIF) and 3 Groups*

| $p$        | IA1  | IA2  | IA3  | IA4  | HL1  | HL2  | HL3  | HL4  |
|------------|------|------|------|------|------|------|------|------|
| $N = 250$  |      |      |      |      |      |      |      |      |
| 0.02       | .077 | .075 | .075 | .075 | .073 | .074 | .082 | .073 |
| 0.1        | .075 | .072 | .074 | .075 | .072 | .073 | .077 | .071 |
| 0.25       | .074 | .072 | .074 | .073 | .072 | .073 | .075 | .071 |
| 0.5        | .071 | .069 | .069 | .071 | .068 | .069 | .067 | .065 |
| 1          | .064 | .062 | .061 | .061 | .061 | .062 | .060 | .060 |
| 2          | .069 | .065 | .060 | .067 | .065 | .065 | .069 | .069 |
| $N = 500$  |      |      |      |      |      |      |      |      |
| 0.02       | .044 | .043 | .054 | .056 | .043 | .044 | .056 | .058 |
| 0.1        | .044 | .043 | .055 | .055 | .043 | .044 | .055 | .059 |
| 0.25       | .043 | .042 | .053 | .053 | .042 | .042 | .054 | .056 |
| 0.5        | .041 | .041 | .049 | .050 | .041 | .041 | .052 | .053 |
| 1          | .040 | .039 | .046 | .046 | .039 | .039 | .048 | .048 |
| 2          | .041 | .041 | .047 | .049 | .041 | .041 | .053 | .053 |
| $N = 1000$ |      |      |      |      |      |      |      |      |
| 0.02       | .037 | .037 | .044 | .042 | .037 | .037 | .040 | .040 |
| 0.1        | .036 | .036 | .044 | .042 | .037 | .037 | .039 | .040 |
| 0.25       | .036 | .036 | .043 | .041 | .035 | .036 | .037 | .038 |
| 0.5        | .034 | .034 | .040 | .038 | .034 | .034 | .036 | .035 |
| 1          | .033 | .033 | .036 | .034 | .033 | .033 | .034 | .034 |
| 2          | .032 | .032 | .035 | .034 | .032 | .032 | .036 | .036 |
| $N = 5000$ |      |      |      |      |      |      |      |      |
| 0.02       | .015 | .015 | .027 | .026 | .015 | .015 | .015 | .015 |
| 0.1        | .015 | .015 | .026 | .025 | .014 | .014 | .014 | .014 |
| 0.25       | .015 | .015 | .025 | .024 | .014 | .014 | .014 | .014 |
| 0.5        | .014 | .014 | .023 | .023 | .014 | .014 | .014 | .014 |
| 1          | .014 | .014 | .020 | .019 | .014 | .014 | .014 | .014 |
| 2          | .014 | .014 | .016 | .015 | .014 | .014 | .014 | .014 |

*Note.*  $p$  = power used in invariance alignment (IA) or Haberman linking (HL) approaches;  $N$  = sample size; IA1 corresponds to the IA specification proposed by Asparouhov and Muthén [1], and HL3 is the original specification of Haberman [2].

Table B6

*Study 2: Average Absolute Bias (ABIAS) of Group Standard Deviations as a Function of Sample Size in the Condition of No Differential Item Functioning (No DIF) and 3 Groups*

| $p$        | IA1  | IA2  | IA3  | IA4  | HL1  | HL2  | HL3  | HL4  |
|------------|------|------|------|------|------|------|------|------|
| $N = 250$  |      |      |      |      |      |      |      |      |
| 0.02       | .043 | .007 | .006 | .044 | .006 | .010 | .007 | .010 |
| 0.1        | .043 | .007 | .005 | .044 | .006 | .009 | .006 | .009 |
| 0.25       | .044 | .008 | .007 | .045 | .006 | .010 | .006 | .010 |
| 0.5        | .044 | .008 | .006 | .045 | .005 | .008 | .005 | .008 |
| 1          | .043 | .007 | .006 | .043 | .004 | .007 | .004 | .008 |
| 2          | .041 | .006 | .005 | .040 | .005 | .006 | .007 | .007 |
| $N = 500$  |      |      |      |      |      |      |      |      |
| 0.02       | .019 | .006 | .006 | .019 | .009 | .010 | .009 | .010 |
| 0.1        | .019 | .006 | .005 | .019 | .009 | .009 | .009 | .010 |
| 0.25       | .021 | .005 | .004 | .021 | .009 | .008 | .009 | .009 |
| 0.5        | .021 | .004 | .004 | .021 | .008 | .006 | .007 | .007 |
| 1          | .020 | .002 | .002 | .020 | .005 | .002 | .005 | .003 |
| 2          | .018 | .001 | .001 | .017 | .004 | .001 | .004 | .004 |
| $N = 1000$ |      |      |      |      |      |      |      |      |
| 0.02       | .009 | .002 | .003 | .010 | .007 | .002 | .007 | .001 |
| 0.1        | .009 | .002 | .003 | .009 | .006 | .002 | .007 | .001 |
| 0.25       | .009 | .001 | .003 | .010 | .006 | .002 | .006 | .001 |
| 0.5        | .009 | .001 | .003 | .010 | .005 | .001 | .006 | .002 |
| 1          | .009 | .001 | .003 | .010 | .004 | .001 | .004 | .001 |
| 2          | .009 | .000 | .001 | .009 | .002 | .000 | .002 | .001 |
| $N = 5000$ |      |      |      |      |      |      |      |      |
| 0.02       | .001 | .001 | .004 | .004 | .004 | .001 | .004 | .001 |
| 0.1        | .001 | .001 | .004 | .004 | .004 | .000 | .004 | .001 |
| 0.25       | .001 | .001 | .004 | .003 | .003 | .000 | .003 | .000 |
| 0.5        | .001 | .000 | .003 | .003 | .003 | .000 | .003 | .000 |
| 1          | .002 | .000 | .002 | .002 | .002 | .000 | .002 | .000 |
| 2          | .002 | .001 | .001 | .002 | .001 | .001 | .001 | .001 |

*Note.*  $p$  = power used in invariance alignment (IA) or Haberman linking (HL) approaches;  $N$  = sample size; IA1 corresponds to the IA specification proposed by Asparouhov and Muthén [1], and HL3 is the original specification of Haberman [2].



Table B7

*Study 2: Average Absolute Bias (ABIAS) of Group Standard Deviations as a Function of Sample Size in the Condition of No Differential Item Functioning (No DIF) and 6 Groups*

| $p$        | IA1  | IA2  | IA3  | IA4  | HL1  | HL2  | HL3  | HL4  |
|------------|------|------|------|------|------|------|------|------|
| $N = 250$  |      |      |      |      |      |      |      |      |
| 0.02       | .096 | .006 | .020 | .079 | .007 | .009 | .007 | .009 |
| 0.1        | .094 | .005 | .020 | .077 | .006 | .008 | .007 | .008 |
| 0.25       | .084 | .005 | .021 | .118 | .006 | .007 | .006 | .008 |
| 0.5        | .075 | .004 | .021 | .091 | .006 | .006 | .006 | .007 |
| 1          | .063 | .003 | .020 | .051 | .005 | .006 | .007 | .006 |
| 2          | .053 | .007 | .007 | .064 | .006 | .007 | .037 | .034 |
| $N = 500$  |      |      |      |      |      |      |      |      |
| 0.02       | .034 | .005 | .015 | .023 | .003 | .004 | .004 | .004 |
| 0.1        | .034 | .004 | .015 | .023 | .003 | .004 | .005 | .004 |
| 0.25       | .034 | .005 | .015 | .024 | .004 | .004 | .005 | .004 |
| 0.5        | .034 | .004 | .015 | .024 | .003 | .004 | .005 | .003 |
| 1          | .032 | .004 | .015 | .024 | .003 | .004 | .005 | .003 |
| 2          | .031 | .005 | .009 | .024 | .003 | .005 | .008 | .007 |
| $N = 1000$ |      |      |      |      |      |      |      |      |
| 0.02       | .016 | .003 | .014 | .017 | .005 | .002 | .005 | .002 |
| 0.1        | .016 | .003 | .014 | .017 | .005 | .003 | .005 | .003 |
| 0.25       | .016 | .003 | .014 | .017 | .005 | .003 | .005 | .003 |
| 0.5        | .016 | .002 | .013 | .017 | .006 | .002 | .006 | .002 |
| 1          | .015 | .002 | .011 | .015 | .005 | .001 | .006 | .002 |
| 2          | .014 | .002 | .006 | .011 | .003 | .002 | .005 | .004 |
| $N = 5000$ |      |      |      |      |      |      |      |      |
| 0.02       | .003 | .001 | .020 | .018 | .005 | .001 | .005 | .001 |
| 0.1        | .003 | .001 | .020 | .017 | .005 | .001 | .005 | .001 |
| 0.25       | .003 | .001 | .019 | .017 | .005 | .001 | .005 | .001 |
| 0.5        | .004 | .001 | .018 | .015 | .005 | .001 | .005 | .001 |
| 1          | .004 | .001 | .013 | .010 | .004 | .001 | .004 | .001 |
| 2          | .004 | .001 | .005 | .005 | .002 | .001 | .003 | .001 |

*Note.*  $p$  = power used in invariance alignment (IA) or Haberman linking (HL) approaches;  $N$  = sample size; IA1 corresponds to the IA specification proposed by Asparouhov and Muthén [1], and HL3 is the original specification of Haberman [2].

Table B8

*Study 2: Average Absolute Bias (ABIAS) of Group Standard Deviations as a Function of Sample Size in the Condition of Differential Item Functioning (DIF) and 3 Groups*

| $p$        | IA1  | IA2  | IA3  | IA4  | HL1  | HL2  | HL3  | HL4  |
|------------|------|------|------|------|------|------|------|------|
| $N = 250$  |      |      |      |      |      |      |      |      |
| 0.02       | .040 | .017 | .015 | .040 | .022 | .019 | .022 | .019 |
| 0.1        | .040 | .017 | .015 | .040 | .023 | .019 | .024 | .019 |
| 0.25       | .040 | .017 | .014 | .041 | .019 | .018 | .019 | .018 |
| 0.5        | .038 | .013 | .010 | .038 | .015 | .013 | .015 | .013 |
| 1          | .032 | .012 | .008 | .033 | .012 | .012 | .012 | .011 |
| 2          | .027 | .018 | .010 | .028 | .017 | .018 | .017 | .017 |
| $N = 500$  |      |      |      |      |      |      |      |      |
| 0.02       | .019 | .006 | .003 | .019 | .008 | .006 | .008 | .007 |
| 0.1        | .019 | .006 | .002 | .019 | .007 | .006 | .008 | .006 |
| 0.25       | .019 | .005 | .002 | .020 | .006 | .006 | .007 | .006 |
| 0.5        | .018 | .005 | .002 | .018 | .006 | .006 | .006 | .007 |
| 1          | .017 | .009 | .005 | .018 | .008 | .009 | .008 | .008 |
| 2          | .018 | .017 | .013 | .016 | .017 | .017 | .015 | .015 |
| $N = 1000$ |      |      |      |      |      |      |      |      |
| 0.02       | .008 | .001 | .004 | .010 | .007 | .002 | .006 | .003 |
| 0.1        | .008 | .002 | .004 | .010 | .007 | .002 | .006 | .003 |
| 0.25       | .008 | .002 | .004 | .010 | .008 | .002 | .007 | .003 |
| 0.5        | .008 | .003 | .004 | .009 | .007 | .002 | .007 | .003 |
| 1          | .009 | .004 | .003 | .008 | .006 | .004 | .006 | .003 |
| 2          | .014 | .014 | .010 | .011 | .013 | .014 | .011 | .012 |
| $N = 5000$ |      |      |      |      |      |      |      |      |
| 0.02       | .003 | .001 | .006 | .005 | .003 | .001 | .003 | .001 |
| 0.1        | .003 | .001 | .006 | .005 | .003 | .001 | .003 | .001 |
| 0.25       | .003 | .001 | .005 | .005 | .003 | .001 | .003 | .001 |
| 0.5        | .003 | .001 | .005 | .005 | .002 | .001 | .002 | .001 |
| 1          | .003 | .001 | .002 | .004 | .002 | .001 | .002 | .001 |
| 2          | .013 | .013 | .011 | .011 | .013 | .013 | .010 | .011 |

*Note.*  $p$  = power used in invariance alignment (IA) or Haberman linking (HL) approaches;  $N$  = sample size; IA1 corresponds to the IA specification proposed by Asparouhov and Muthén [1], and HL3 is the original specification of Haberman [2].

Table B9

*Study 2: Average Absolute Bias (ABIAS) of Group Standard Deviations as a Function of Sample Size in the Condition of Differential Item Functioning (DIF) and 6 Groups*

| $p$        | IA1  | IA2  | IA3  | IA4  | HL1  | HL2  | HL3  | HL4  |
|------------|------|------|------|------|------|------|------|------|
| $N = 250$  |      |      |      |      |      |      |      |      |
| 0.02       | .105 | .017 | .031 | .082 | .017 | .014 | .017 | .015 |
| 0.1        | .098 | .018 | .031 | .066 | .018 | .015 | .017 | .016 |
| 0.25       | .094 | .019 | .033 | .091 | .017 | .015 | .017 | .017 |
| 0.5        | .084 | .020 | .035 | .052 | .018 | .017 | .018 | .017 |
| 1          | .078 | .022 | .036 | .053 | .021 | .021 | .018 | .018 |
| 2          | .069 | .022 | .030 | .045 | .022 | .022 | .009 | .006 |
| $N = 500$  |      |      |      |      |      |      |      |      |
| 0.02       | .042 | .012 | .026 | .037 | .010 | .008 | .011 | .012 |
| 0.1        | .043 | .013 | .028 | .037 | .010 | .008 | .012 | .013 |
| 0.25       | .043 | .014 | .029 | .037 | .010 | .009 | .014 | .014 |
| 0.5        | .044 | .016 | .029 | .037 | .011 | .011 | .014 | .013 |
| 1          | .045 | .020 | .030 | .037 | .015 | .015 | .017 | .017 |
| 2          | .043 | .021 | .029 | .034 | .021 | .021 | .017 | .018 |
| $N = 1000$ |      |      |      |      |      |      |      |      |
| 0.02       | .022 | .008 | .027 | .029 | .006 | .006 | .008 | .006 |
| 0.1        | .022 | .008 | .027 | .028 | .006 | .007 | .008 | .007 |
| 0.25       | .023 | .009 | .027 | .029 | .007 | .007 | .009 | .009 |
| 0.5        | .024 | .012 | .028 | .029 | .008 | .009 | .011 | .011 |
| 1          | .030 | .019 | .029 | .030 | .013 | .014 | .017 | .017 |
| 2          | .032 | .022 | .029 | .030 | .022 | .022 | .023 | .023 |
| $N = 5000$ |      |      |      |      |      |      |      |      |
| 0.02       | .004 | .002 | .028 | .026 | .004 | .002 | .004 | .002 |
| 0.1        | .004 | .002 | .028 | .026 | .004 | .002 | .004 | .002 |
| 0.25       | .004 | .002 | .029 | .027 | .004 | .002 | .004 | .002 |
| 0.5        | .005 | .003 | .029 | .026 | .004 | .003 | .004 | .003 |
| 1          | .012 | .012 | .026 | .024 | .006 | .007 | .009 | .009 |
| 2          | .020 | .020 | .026 | .024 | .020 | .020 | .024 | .025 |

*Note.*  $p$  = power used in invariance alignment (IA) or Haberman linking (HL) approaches;  $N$  = sample size; IA1 corresponds to the IA specification proposed by Asparouhov and Muthén [1], and HL3 is the original specification of Haberman [2].

Table B10

*Study 2: Average Root Mean Square Error (ARMSE) of Group Standard Deviations as a Function of Sample Size in the Condition of No Differential Item Functioning (No DIF) and 3 Groups*

| $p$        | IA1  | IA2  | IA3  | IA4  | HL1  | HL2  | HL3  | HL4  |
|------------|------|------|------|------|------|------|------|------|
| $N = 250$  |      |      |      |      |      |      |      |      |
| 0.02       | .088 | .076 | .076 | .088 | .071 | .076 | .071 | .076 |
| 0.1        | .088 | .075 | .075 | .087 | .071 | .075 | .071 | .075 |
| 0.25       | .086 | .072 | .072 | .086 | .066 | .072 | .066 | .072 |
| 0.5        | .081 | .066 | .066 | .081 | .061 | .068 | .060 | .068 |
| 1          | .072 | .057 | .057 | .072 | .051 | .057 | .051 | .057 |
| 2          | .071 | .054 | .053 | .071 | .049 | .054 | .049 | .054 |
| $N = 500$  |      |      |      |      |      |      |      |      |
| 0.02       | .059 | .058 | .059 | .059 | .052 | .059 | .052 | .059 |
| 0.1        | .058 | .057 | .058 | .058 | .051 | .058 | .051 | .058 |
| 0.25       | .057 | .056 | .056 | .057 | .050 | .055 | .050 | .055 |
| 0.5        | .054 | .051 | .052 | .054 | .045 | .051 | .046 | .051 |
| 1          | .047 | .043 | .043 | .047 | .038 | .043 | .038 | .043 |
| 2          | .046 | .039 | .040 | .046 | .037 | .039 | .037 | .040 |
| $N = 1000$ |      |      |      |      |      |      |      |      |
| 0.02       | .038 | .034 | .035 | .038 | .032 | .034 | .032 | .034 |
| 0.1        | .037 | .033 | .034 | .038 | .032 | .033 | .032 | .033 |
| 0.25       | .036 | .032 | .032 | .036 | .030 | .032 | .030 | .032 |
| 0.5        | .034 | .030 | .030 | .034 | .028 | .030 | .028 | .030 |
| 1          | .029 | .027 | .027 | .029 | .025 | .026 | .025 | .026 |
| 2          | .027 | .026 | .026 | .027 | .024 | .026 | .024 | .026 |
| $N = 5000$ |      |      |      |      |      |      |      |      |
| 0.02       | .015 | .016 | .016 | .016 | .014 | .016 | .014 | .016 |
| 0.1        | .015 | .015 | .016 | .016 | .014 | .015 | .014 | .015 |
| 0.25       | .015 | .015 | .015 | .015 | .014 | .015 | .014 | .015 |
| 0.5        | .014 | .014 | .015 | .014 | .013 | .014 | .013 | .014 |
| 1          | .013 | .014 | .014 | .014 | .013 | .013 | .012 | .013 |
| 2          | .013 | .013 | .013 | .013 | .012 | .013 | .012 | .013 |

*Note.*  $p$  = power used in invariance alignment (IA) or Haberman linking (HL) approaches;  $N$  = sample size; IA1 corresponds to the IA specification proposed by Asparouhov and Muthén [1], and HL3 is the original specification of Haberman [2].

Table B11

*Study 2: Average Root Mean Square Error (ARMSE) of Group Standard Deviations as a Function of Sample Size in the Condition of No Differential Item Functioning (No DIF) and 6 Groups*

| $p$        | IA1  | IA2  | IA3  | IA4  | HL1  | HL2  | HL3  | HL4  |
|------------|------|------|------|------|------|------|------|------|
| $N = 250$  |      |      |      |      |      |      |      |      |
| 0.02       | .173 | .081 | .087 | .177 | .076 | .081 | .077 | .082 |
| 0.1        | .156 | .079 | .085 | .188 | .075 | .080 | .076 | .080 |
| 0.25       | .133 | .076 | .082 | .262 | .073 | .076 | .073 | .076 |
| 0.5        | .117 | .069 | .075 | .215 | .068 | .073 | .068 | .073 |
| 1          | .096 | .062 | .067 | .098 | .058 | .064 | .059 | .064 |
| 2          | .088 | .063 | .082 | .126 | .057 | .063 | .107 | .102 |
| $N = 500$  |      |      |      |      |      |      |      |      |
| 0.02       | .068 | .050 | .055 | .073 | .052 | .058 | .051 | .057 |
| 0.1        | .067 | .049 | .055 | .071 | .051 | .058 | .050 | .057 |
| 0.25       | .065 | .048 | .053 | .069 | .049 | .054 | .049 | .053 |
| 0.5        | .062 | .044 | .050 | .064 | .045 | .049 | .045 | .049 |
| 1          | .056 | .040 | .045 | .056 | .039 | .042 | .040 | .042 |
| 2          | .053 | .040 | .043 | .055 | .038 | .040 | .039 | .041 |
| $N = 1000$ |      |      |      |      |      |      |      |      |
| 0.02       | .042 | .037 | .042 | .045 | .037 | .040 | .037 | .039 |
| 0.1        | .041 | .036 | .041 | .044 | .036 | .039 | .036 | .038 |
| 0.25       | .040 | .034 | .039 | .042 | .035 | .037 | .035 | .037 |
| 0.5        | .038 | .032 | .036 | .039 | .032 | .035 | .032 | .034 |
| 1          | .035 | .029 | .033 | .036 | .028 | .030 | .028 | .030 |
| 2          | .035 | .028 | .030 | .036 | .028 | .028 | .028 | .029 |
| $N = 5000$ |      |      |      |      |      |      |      |      |
| 0.02       | .014 | .013 | .026 | .024 | .015 | .014 | .015 | .014 |
| 0.1        | .014 | .013 | .026 | .024 | .015 | .014 | .015 | .014 |
| 0.25       | .014 | .013 | .025 | .023 | .014 | .014 | .014 | .014 |
| 0.5        | .013 | .013 | .023 | .022 | .014 | .013 | .014 | .013 |
| 1          | .013 | .012 | .018 | .017 | .013 | .012 | .013 | .012 |
| 2          | .013 | .012 | .014 | .013 | .012 | .012 | .012 | .012 |

*Note.*  $p$  = power used in invariance alignment (IA) or Haberman linking (HL) approaches;  $N$  = sample size; IA1 corresponds to the IA specification proposed by Asparouhov and Muthén [1], and HL3 is the original specification of Haberman [2].

Table B12

*Study 2: Average Root Mean Square Error (ARMSE) of Group Standard Deviations as a Function of Sample Size in the Condition of Differential Item Functioning (DIF) and 3 Groups*

| $p$        | IA1  | IA2  | IA3  | IA4  | HL1  | HL2  | HL3  | HL4  |
|------------|------|------|------|------|------|------|------|------|
| $N = 250$  |      |      |      |      |      |      |      |      |
| 0.02       | .095 | .085 | .085 | .095 | .083 | .082 | .083 | .082 |
| 0.1        | .095 | .083 | .083 | .095 | .081 | .081 | .082 | .081 |
| 0.25       | .093 | .079 | .079 | .093 | .074 | .079 | .075 | .080 |
| 0.5        | .084 | .069 | .068 | .083 | .065 | .072 | .065 | .073 |
| 1          | .070 | .059 | .059 | .070 | .054 | .059 | .054 | .059 |
| 2          | .065 | .058 | .057 | .064 | .053 | .058 | .053 | .058 |
| $N = 500$  |      |      |      |      |      |      |      |      |
| 0.02       | .058 | .052 | .052 | .058 | .050 | .051 | .050 | .052 |
| 0.1        | .057 | .050 | .051 | .057 | .049 | .051 | .049 | .051 |
| 0.25       | .054 | .048 | .049 | .055 | .047 | .048 | .047 | .049 |
| 0.5        | .050 | .044 | .044 | .051 | .042 | .045 | .042 | .046 |
| 1          | .044 | .039 | .039 | .044 | .035 | .039 | .035 | .039 |
| 2          | .042 | .040 | .039 | .041 | .036 | .040 | .036 | .040 |
| $N = 1000$ |      |      |      |      |      |      |      |      |
| 0.02       | .036 | .035 | .036 | .037 | .032 | .036 | .033 | .037 |
| 0.1        | .036 | .034 | .035 | .036 | .032 | .035 | .032 | .036 |
| 0.25       | .034 | .033 | .033 | .035 | .031 | .034 | .031 | .035 |
| 0.5        | .033 | .031 | .031 | .033 | .029 | .031 | .029 | .031 |
| 1          | .030 | .028 | .028 | .030 | .026 | .028 | .026 | .028 |
| 2          | .032 | .029 | .028 | .031 | .029 | .029 | .028 | .029 |
| $N = 5000$ |      |      |      |      |      |      |      |      |
| 0.02       | .014 | .015 | .016 | .015 | .014 | .015 | .014 | .015 |
| 0.1        | .014 | .014 | .015 | .015 | .014 | .014 | .014 | .014 |
| 0.25       | .014 | .014 | .015 | .015 | .013 | .014 | .013 | .014 |
| 0.5        | .014 | .013 | .014 | .014 | .012 | .013 | .012 | .013 |
| 1          | .013 | .013 | .013 | .013 | .011 | .012 | .011 | .012 |
| 2          | .018 | .018 | .016 | .016 | .017 | .018 | .015 | .016 |

*Note.*  $p$  = power used in invariance alignment (IA) or Haberman linking (HL) approaches;  $N$  = sample size; IA1 corresponds to the IA specification proposed by Asparouhov and Muthén [1], and HL3 is the original specification of Haberman [2].

Table B13

*Study 2: Average Root Mean Square Error (ARMSE) of Group Standard Deviations as a Function of Sample Size in the Condition of Differential Item Functioning (DIF) and 6 Groups*

| $p$        | IA1  | IA2  | IA3  | IA4  | HL1  | HL2  | HL3  | HL4  |
|------------|------|------|------|------|------|------|------|------|
| $N = 250$  |      |      |      |      |      |      |      |      |
| 0.02       | .170 | .076 | .083 | .181 | .077 | .082 | .078 | .083 |
| 0.1        | .140 | .075 | .082 | .196 | .076 | .082 | .076 | .083 |
| 0.25       | .133 | .072 | .080 | .252 | .072 | .079 | .073 | .080 |
| 0.5        | .114 | .067 | .075 | .146 | .067 | .073 | .067 | .073 |
| 1          | .100 | .060 | .069 | .091 | .059 | .063 | .058 | .062 |
| 2          | .093 | .064 | .069 | .087 | .057 | .064 | .056 | .062 |
| $N = 500$  |      |      |      |      |      |      |      |      |
| 0.02       | .071 | .057 | .064 | .071 | .055 | .057 | .057 | .059 |
| 0.1        | .070 | .056 | .064 | .070 | .054 | .057 | .056 | .060 |
| 0.25       | .068 | .054 | .062 | .068 | .051 | .055 | .053 | .057 |
| 0.5        | .065 | .051 | .059 | .064 | .048 | .052 | .050 | .053 |
| 1          | .062 | .048 | .054 | .059 | .044 | .047 | .046 | .049 |
| 2          | .060 | .050 | .054 | .057 | .045 | .050 | .045 | .049 |
| $N = 1000$ |      |      |      |      |      |      |      |      |
| 0.02       | .044 | .041 | .050 | .050 | .040 | .042 | .041 | .042 |
| 0.1        | .044 | .039 | .049 | .049 | .039 | .041 | .040 | .042 |
| 0.25       | .043 | .038 | .048 | .048 | .038 | .040 | .039 | .041 |
| 0.5        | .042 | .037 | .046 | .046 | .036 | .038 | .037 | .039 |
| 1          | .043 | .037 | .044 | .044 | .033 | .035 | .035 | .037 |
| 2          | .045 | .037 | .042 | .043 | .036 | .037 | .037 | .039 |
| $N = 5000$ |      |      |      |      |      |      |      |      |
| 0.02       | .015 | .014 | .032 | .031 | .015 | .015 | .015 | .015 |
| 0.1        | .015 | .014 | .032 | .031 | .015 | .015 | .015 | .015 |
| 0.25       | .015 | .014 | .032 | .031 | .014 | .015 | .014 | .015 |
| 0.5        | .014 | .014 | .032 | .030 | .014 | .014 | .014 | .014 |
| 1          | .018 | .018 | .030 | .028 | .014 | .015 | .016 | .016 |
| 2          | .024 | .024 | .029 | .028 | .024 | .024 | .027 | .028 |

*Note.*  $p$  = power used in invariance alignment (IA) or Haberman linking (HL) approaches;  $N$  = sample size; IA1 corresponds to the IA specification proposed by Asparouhov and Muthén [1], and HL3 is the original specification of Haberman [2].

## References

- [1] Tihomir Asparouhov and Bengt Muthén. Multiple-group factor analysis alignment. *Struct. Equ. Modeling*, 21(4):495–508, 2014.
- [2] Shelby J. Haberman. *Linking parameter estimates derived from an item response model through separate calibrations* (Research Report No. RR-09-40). Educational Testing Service, 2009.
